# Supplementary material for: First Metagenomic Survey of the Microbial Diversity in Bioaerosols Emitted in Waste Sorting Plants
Source: Oxford University Press journal article supplement (doi:10.1093/annweh/wxx075), 2017-09-03
Supplement: wxx075_suppl_online_supplementary_material.pdf [file wxx075_suppl_online_supplementary_material.pdf]

## Online Supplementary Material

---

### First metagenomic survey of the microbial diversity in bioaerosols emitted in waste sorting plants

*Jodelle Degois<sup>1</sup>, Frederic Clerc<sup>1</sup>, Xavier Simon<sup>1</sup>, Cyril Bontemps<sup>2</sup>, Pierre Leblond<sup>2</sup>, Philippe Duquenne<sup>1\*</sup>*

<sup>1</sup> Department of pollutant metrology - Institut National de Recherche et de Sécurité (INRS), Vandœuvre-lès Nancy, 54500, France

<sup>2</sup> Université de Lorraine, Institut National de la Recherche Agronomique, Dynamique des Génomes et Adaptation Microbienne (DynAMic), UMR INRA 1128, Nancy, 54000, France

**Table S1:** Proportion of identified 16S sequences from bioaerosol at different taxonomic ranks in samples taken in the WSP. Bioaerosol samples were collected in the Sorting Cabin (SC) and in the Outdoor Reference (OR).<sup>a</sup>: Illumina sequencing; <sup>b</sup>: 454 pyrosequencing.

| Parameters                                                               | SC1     | SC2      | SC3    | OR     |
|--------------------------------------------------------------------------|---------|----------|--------|--------|
| <i>Proportion of identified bacterial 16S rDNA sequences<sup>a</sup></i> |         |          |        |        |
| Total number of reads                                                    | 100,895 | 100,2115 | 69,655 | 78,603 |
| Phylum rank (%)                                                          | 80.93   | 81.65    | 84.08  | 87.10  |
| Familly rank (%)                                                         | 72.85   | 73.04    | 73.59  | 73.76  |
| Genus rank (%)                                                           | 60.69   | 59.69    | 58.48  | 64.08  |
| <i>Proportion of identified Eukaryota 18S rDNA<sup>b</sup> sequences</i> |         |          |        |        |
| Total number of reads                                                    | 14,546  | 16,082   | 21,206 | 6,588  |
| Phylum rank (%)                                                          | 99.41   | 99.49    | 99.49  | 69.97  |
| Familly rank (%)                                                         | 98.63   | 98.65    | 98.96  | 58.03  |
| Genus rank (%)                                                           | 98.63   | 98.65    | 98.96  | 58.03  |

**Table S2:** Bacterial diversity at the family rank (proportion of 16S rDNA reads)

| Phylum              | Family                            | OR    | SC1   | SC2   | SC3   |
|---------------------|-----------------------------------|-------|-------|-------|-------|
| Acidobacteria       | <i>Acidobacteriaceae</i>          | 0.01% | 0.40% | 0.42% | 0.16% |
| Actinobacteria      | <i>Brevibacteriaceae</i>          | 0.04% | 2.40% | 1.63% | 2.10% |
|                     | <i>Corynebacteriaceae</i>         | 0.12% | 0.70% | 0.64% | 0.97% |
|                     | <i>Dermabacteraceae</i>           | 0.01% | 0.48% | 0.58% | 0.61% |
|                     | <i>Geodermatophilaceae</i>        | 0.00% | 0.21% | 0.16% | 0.46% |
|                     | <i>Intrasporangiaceae</i>         | 0.00% | 0.15% | 0.15% | 0.11% |
|                     | <i>Kineosporiaceae</i>            | 0.88% | 0.13% | 0.09% | 0.17% |
|                     | <i>Microbacteriaceae</i>          | 0.44% | 0.50% | 0.62% | 0.80% |
|                     | <i>Micrococcaceae</i>             | 0.06% | 1.90% | 2.36% | 1.90% |
|                     | <i>Nocardiaceae</i>               | 0.01% | 0.10% | 0.16% | 0.15% |
|                     | <i>Nocardioideaceae</i>           | 0.01% | 0.35% | 0.52% | 0.37% |
|                     | <i>Nocardiosaceae</i>             | 0.27% | 0.15% | 0.19% | 0.12% |
|                     | <i>Promicromonosporaceae</i>      | 0.00% | 0.43% | 0.23% | 0.14% |
|                     | <i>Propionibacteriaceae</i>       | 0.53% | 0.07% | 0.12% | 0.43% |
|                     | <i>Pseudonocardiaceae</i>         | 0.56% | 0.68% | 0.54% | 0.59% |
|                     | <i>Streptomycetaceae</i>          | 0.01% | 0.42% | 0.47% | 0.38% |
| Bacteroidetes       | <i>Bacteroidaceae</i>             | 0.00% | 0.17% | 0.17% | 0.01% |
|                     | <i>Chitinophagaceae</i>           | 3.12% | 0.56% | 0.91% | 0.22% |
|                     | <i>Cytophagaceae</i>              | 0.01% | 0.18% | 0.46% | 0.82% |
|                     | <i>Flavobacteriaceae</i>          | 0.14% | 4.93% | 4.84% | 3.82% |
|                     | <i>Porphyromonadaceae</i>         | 2.00% | 0.31% | 0.22% | 0.86% |
|                     | <i>Prevotellaceae</i>             | 0.00% | 0.03% | 0.09% | 0.10% |
|                     | <i>Sphingobacteriaceae</i>        | 1.22% | 0.96% | 1.14% | 1.09% |
|                     | <i>unclassified_Bacteroidetes</i> | 0.13% | 0.28% | 0.35% | 0.86% |
| Chloroflexi         | <i>unclassified_Chloroflexi</i>   | 0.01% | 0.13% | 0.10% | 0.45% |
| Cyanobacteria       | <i>unclassified_Cyanobacteria</i> | 1.73% | 1.40% | 1.03% | 0.96% |
| Deinococcus thermus | <i>Deinococcaceae</i>             | 0.00% | 0.05% | 0.30% | 0.54% |
| Firmicutes          | <i>Aerococcaceae</i>              | 0.03% | 0.59% | 0.91% | 0.98% |
|                     | <i>Bacillaceae</i>                | 0.22% | 1.80% | 1.80% | 2.89% |
|                     | <i>Carnobacteriaceae</i>          | 0.02% | 0.36% | 0.40% | 0.25% |
|                     | <i>Clostridiaceae</i>             | 0.01% | 0.36% | 0.21% | 0.00% |
|                     | <i>Enterococcaceae</i>            | 0.04% | 1.11% | 1.22% | 0.63% |
|                     | <i>Erysipelotrichaceae</i>        | 0.01% | 0.32% | 0.28% | 0.18% |
|                     | <i>Family_XI_Incertae_Sedis</i>   | 0.01% | 0.15% | 0.14% | 0.06% |
|                     | <i>Family_XII_Incertae_Sedis</i>  | 0.00% | 0.19% | 0.12% | 0.25% |
|                     | <i>Lachnospiraceae</i>            | 0.03% | 0.91% | 0.94% | 0.03% |
|                     | <i>Lactobacillaceae</i>           | 0.06% | 2.41% | 2.46% | 2.35% |

|                |                                    |        |       |       |       |
|----------------|------------------------------------|--------|-------|-------|-------|
|                | <i>Leuconostocaceae</i>            | 0.08%  | 3.36% | 3.44% | 3.99% |
|                | <i>Listeriaceae</i>                | 0.01%  | 0.47% | 0.26% | 0.51% |
|                | <i>Paenibacillaceae</i>            | 0.39%  | 0.36% | 0.32% | 0.62% |
|                | <i>Planococcaceae</i>              | 0.13%  | 2.41% | 1.88% | 2.16% |
|                | <i>Ruminococcaceae</i>             | 0.01%  | 0.23% | 0.24% | 0.78% |
|                | <i>Staphylococcaceae</i>           | 0.16%  | 5.68% | 6.08% | 6.89% |
|                | <i>Streptococcaceae</i>            | 0.06%  | 2.96% | 2.47% | 2.83% |
|                | <i>Thermoactinomycetaceae</i>      | 0.00%  | 0.10% | 0.13% | 0.33% |
|                | <i>unclassified_Firmicutes</i>     | 4.98%  | 3.63% | 3.97% | 4.30% |
| Planctomycetes | <i>Planctomycetaceae</i>           | 2.40%  | 0.01% | 0.52% | 1.02% |
| Proteobacteria | <i>Acetobacteraceae</i>            | 0.04%  | 0.84% | 0.97% | 1.65% |
|                | <i>Aeromonadaceae</i>              | 0.01%  | 0.44% | 0.14% | 0.10% |
|                | <i>Alcaligenaceae</i>              | 0.02%  | 0.53% | 0.74% | 0.64% |
|                | <i>Alcaligenes</i>                 | 0.01%  | 0.05% | 0.23% | 0.00% |
|                | <i>Bradyrhizobiaceae</i>           | 5.76%  | 0.17% | 0.36% | 0.24% |
|                | <i>Brucellaceae</i>                | 0.58%  | 0.08% | 0.04% | 0.10% |
|                | <i>Burkholderiaceae</i>            | 21.52% | 0.73% | 0.90% | 0.83% |
|                | <i>Caulobacteraceae</i>            | 4.36%  | 0.73% | 1.00% | 1.14% |
|                | <i>Comamonadaceae</i>              | 5.07%  | 0.96% | 0.74% | 0.91% |
|                | <i>Enterobacteriaceae</i>          | 0.32%  | 9.88% | 9.83% | 8.32% |
|                | <i>Halomonadaceae</i>              | 0.01%  | 0.05% | 0.15% | 0.20% |
|                | <i>Hyphomicrobiaceae</i>           | 0.01%  | 0.24% | 0.25% | 0.35% |
|                | <i>Methylobacteriaceae</i>         | 0.01%  | 0.20% | 0.26% | 0.48% |
|                | <i>Moraxellaceae</i>               | 10.06% | 5.82% | 5.22% | 4.70% |
|                | <i>Nitrosomonadaceae</i>           | 0.00%  | 0.00% | 0.00% | 0.00% |
|                | <i>Oxalobacteraceae</i>            | 0.08%  | 0.95% | 1.23% | 1.02% |
|                | <i>Phyllobacteriaceae</i>          | 3.91%  | 0.31% | 0.32% | 0.10% |
|                | <i>Pseudomonadaceae</i>            | 0.97%  | 4.68% | 5.34% | 4.62% |
|                | <i>Rhodobacteraceae</i>            | 0.06%  | 1.23% | 1.13% | 0.59% |
|                | <i>Rhodospirillaceae</i>           | 0.00%  | 0.20% | 0.03% | 0.00% |
|                | <i>Sinobacteraceae</i>             | 0.00%  | 0.02% | 0.10% | 0.00% |
|                | <i>Sphingomonadaceae</i>           | 0.46%  | 0.57% | 0.48% | 1.00% |
|                | <i>unclassified_Proteobacteria</i> | 6.34%  | 1.69% | 1.79% | 2.60% |
|                | <i>Vibrionaceae</i>                | 0.01%  | 0.32% | 0.23% | 0.26% |
|                | <i>Xanthomonadaceae</i>            | 8.10%  | 3.33% | 2.50% | 2.04% |
